# Supplementary figures and images for: Effect of ceria promotion on the catalytic performance of Ni/SBA-16 catalysts for CO2 methanation
Source: Royal Society of Chemistry journal article supplement (doi:10.1039/d0cy00922a), 2020-01-01

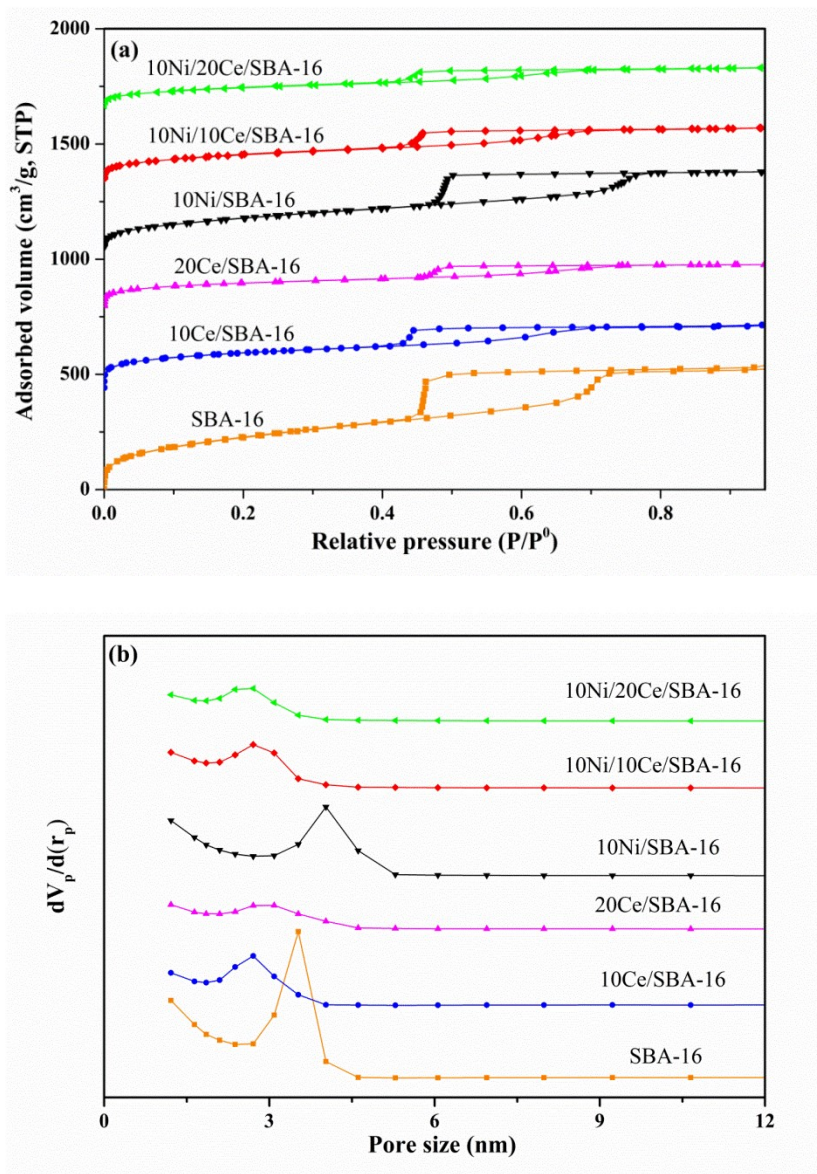

Fig. 1

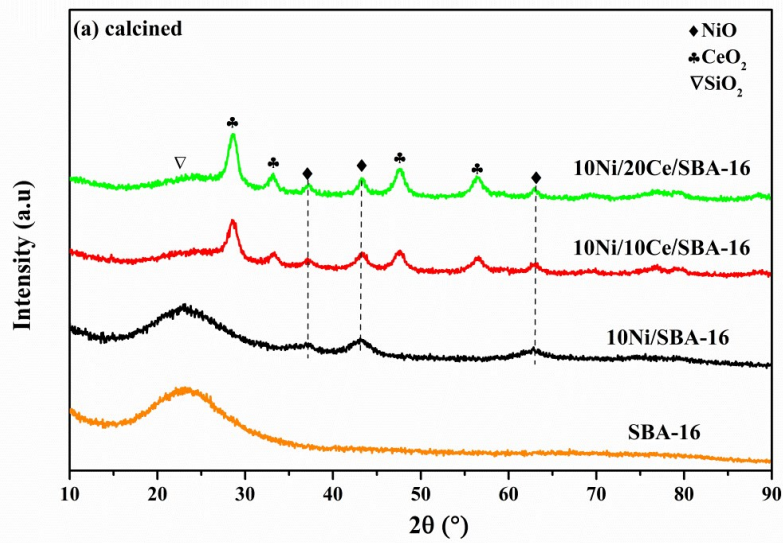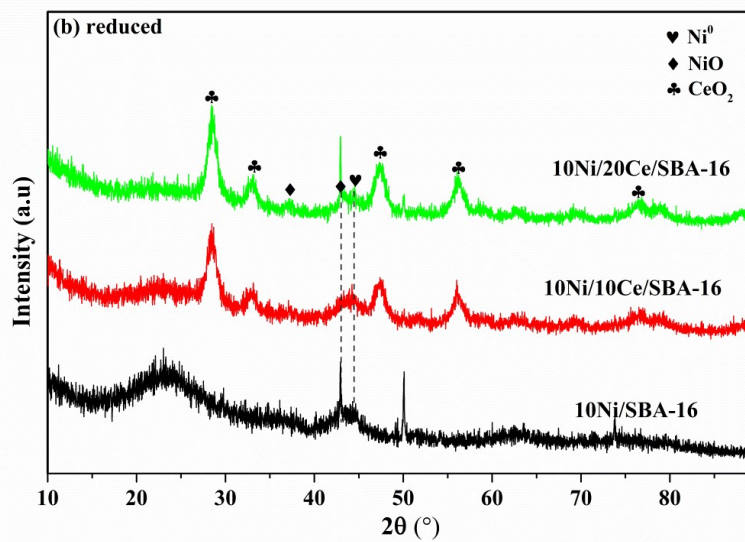

Fig. 2

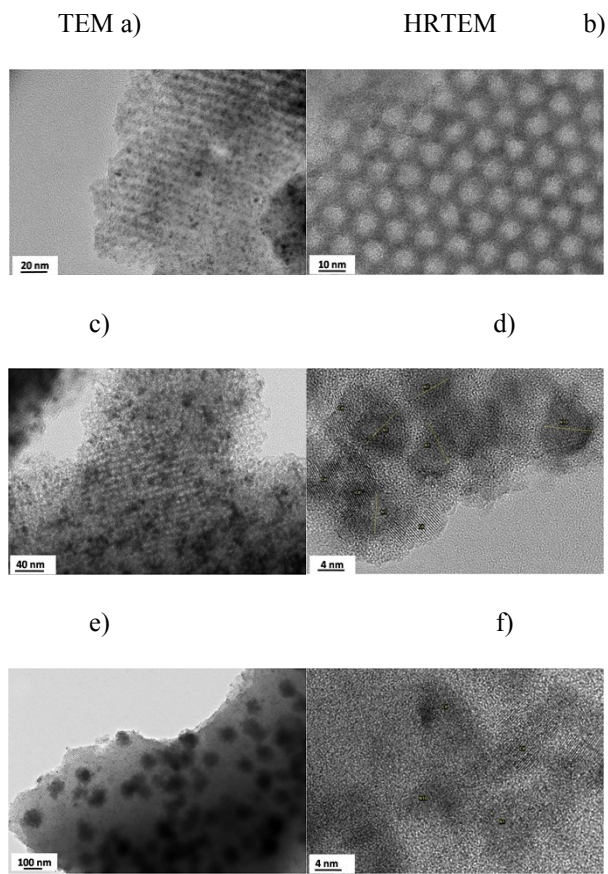

Fig. 3

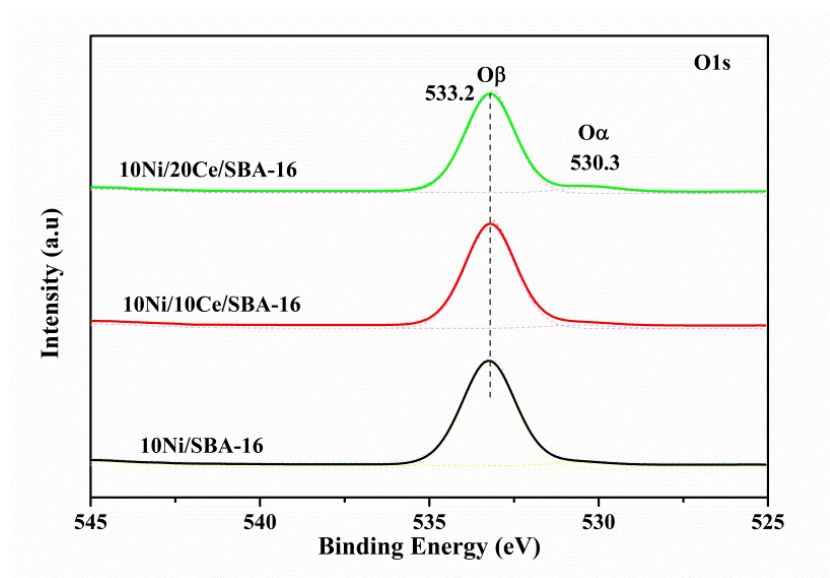

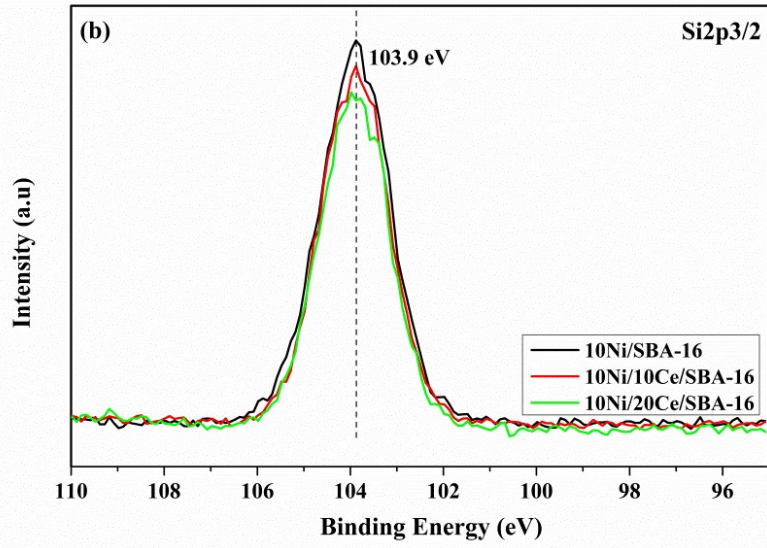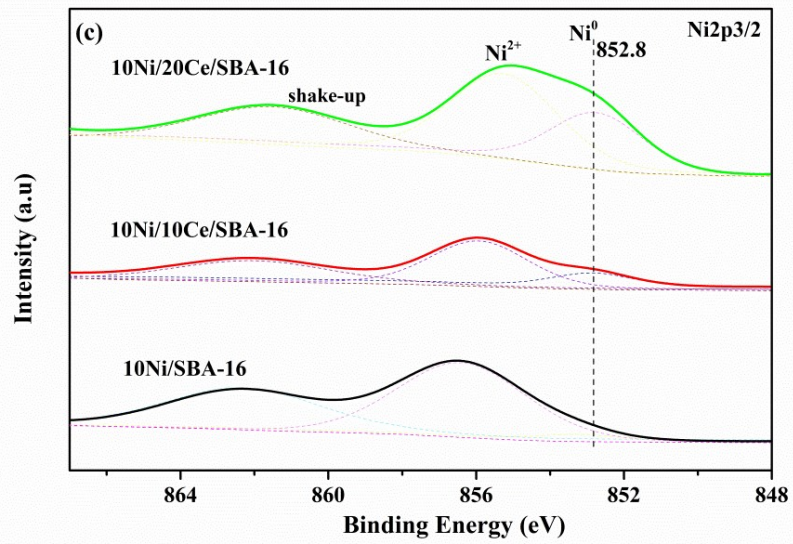

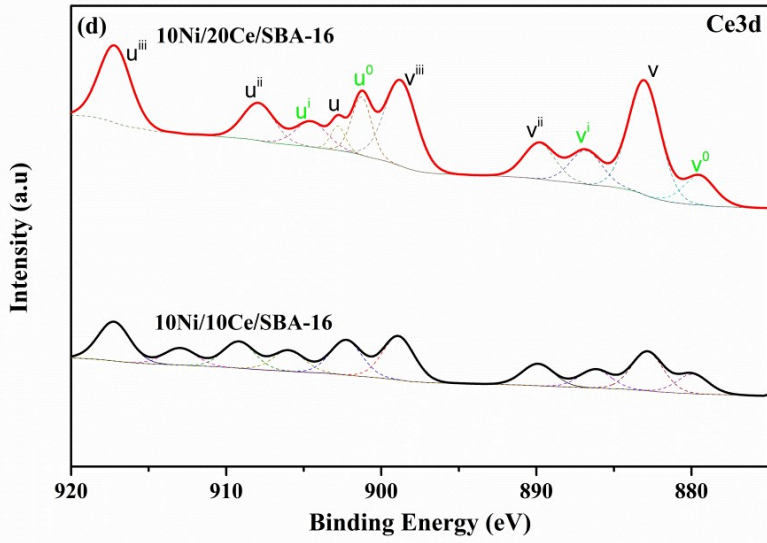

Fig.4

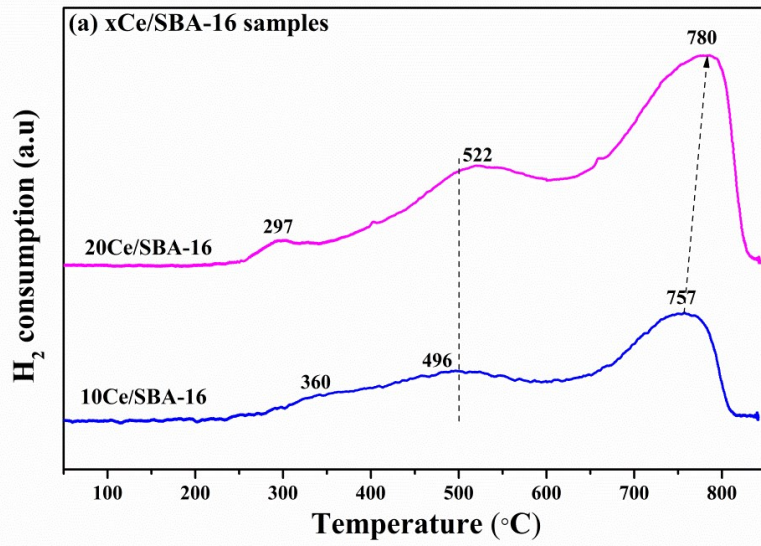

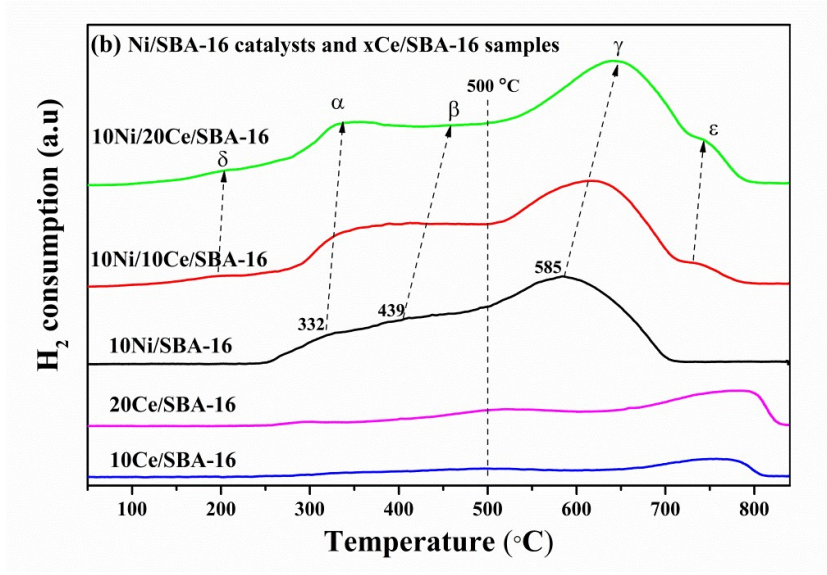

Fig.5

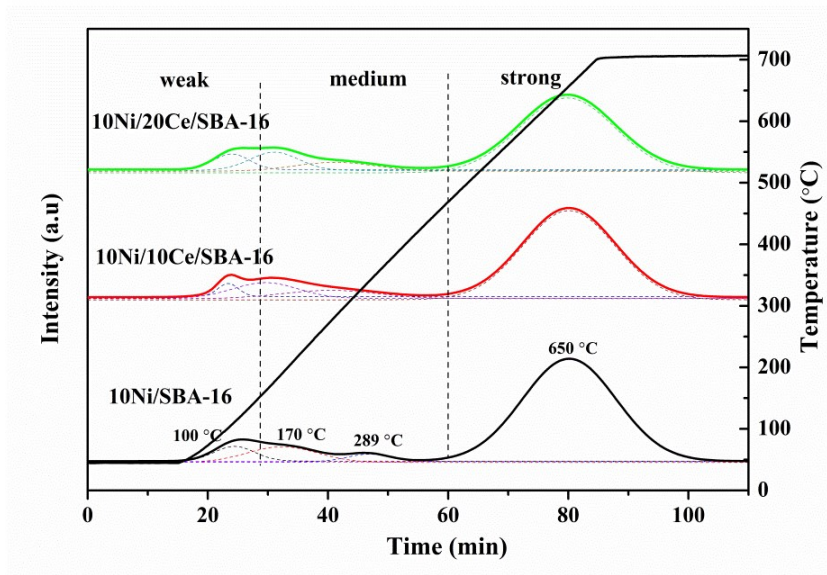

Fig.6

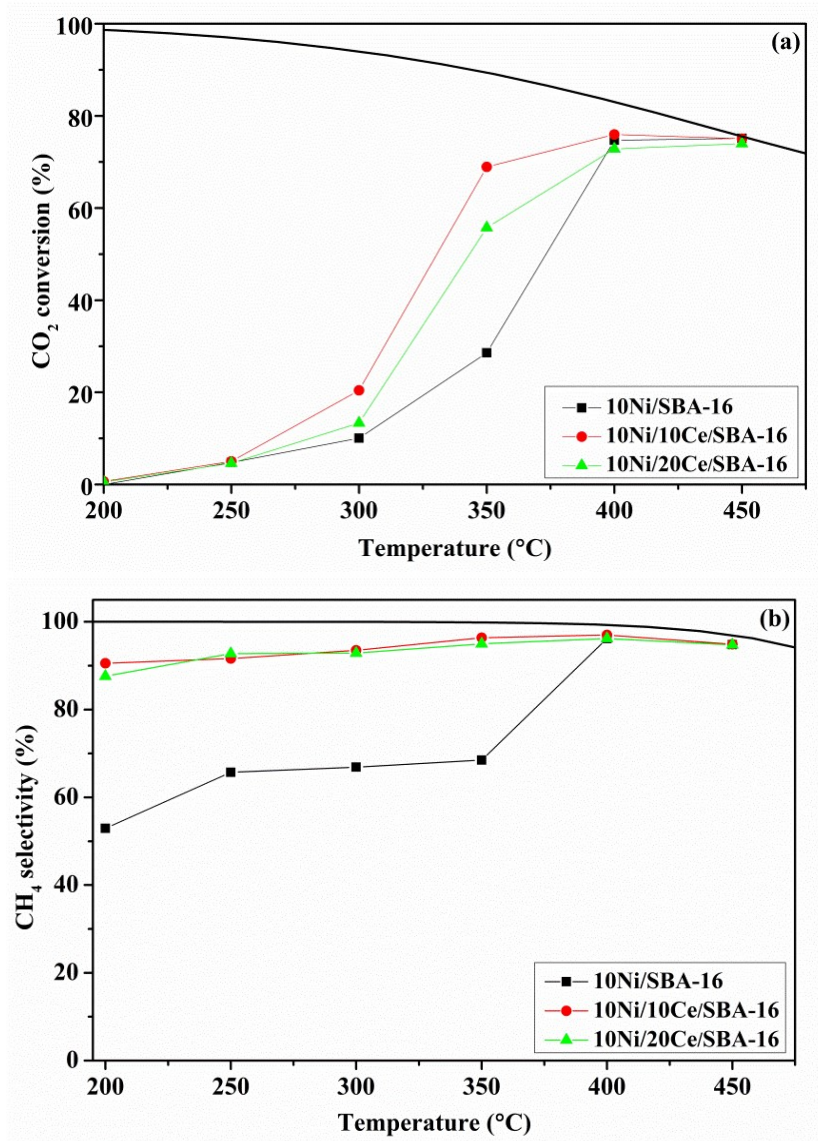

Fig.7

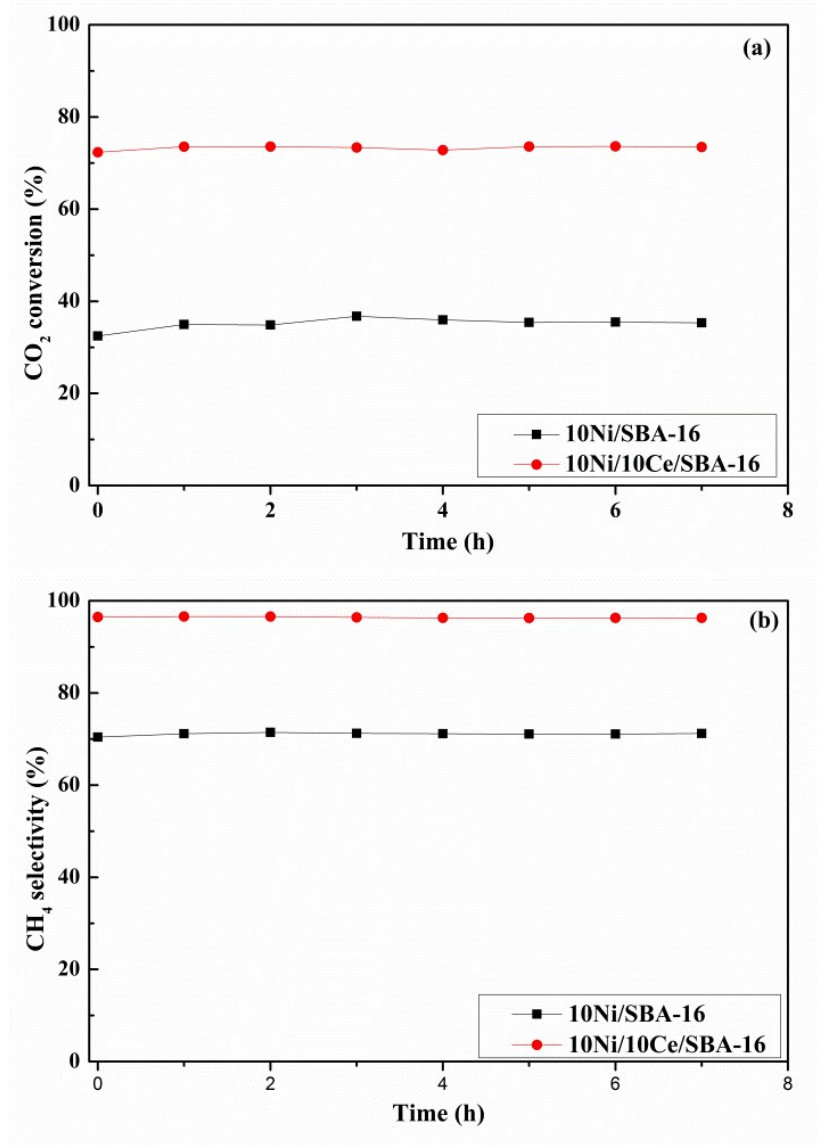

Fig. 8



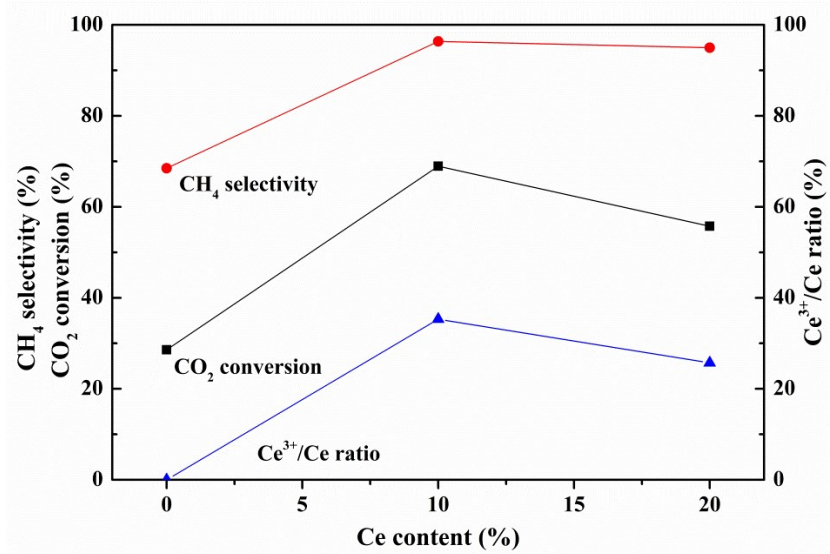

Fig.9

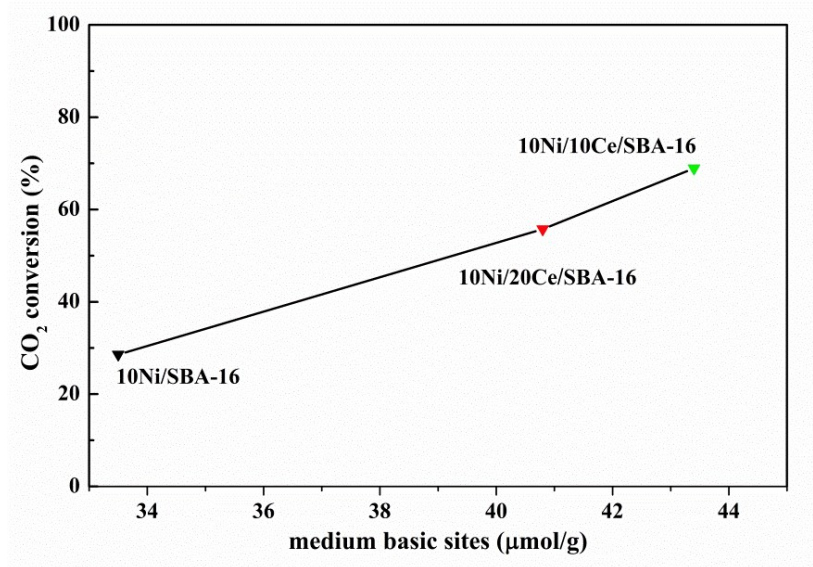

Fig.10

Supplement: d0cy00922a1.pdf [file d0cy00922a1.pdf]
